# Supplementary material for: Identifying Pedophilic Interest in Sex Offenders Against Children With the Indirect Choice Reaction Time Task
Source: Atypon-hosted journal article supplement (doi:10.1027/1015-5759/a000293), 2015-12-09
Supplement: 1015-5759_a000293_esm1.pdf [file 1015-5759_a000293_esm1.pdf]

## ESM 1. List of abbreviations

---

| Abbreviation      | Description                                             |
|-------------------|---------------------------------------------------------|
| <i>AUC</i>        | Area under the Curve                                    |
| CC                | community controls                                      |
| CRT               | choice reaction time                                    |
| CRT-NRP           | choice reaction time task using the Not-Real-People Set |
| CRT-VPS           | choice reaction time task using the Virtual People Set  |
| CSO               | child sex offenders                                     |
| CSO <sub>p</sub>  | pedophilic child sex offenders (SSPI score $\geq 3$ )   |
| CSO <sub>np</sub> | non-pedophilic child sex offenders (SSPI score $< 3$ )  |
| GEE               | Generalized Estimating Equations                        |
| MSI               | Multiphasic Sex Inventory                               |
| NRP               | Not-Real-People Set                                     |
| NSO               | non-sex offenders                                       |
| OSO               | other sex offenders                                     |
| PPG               | penile plethysmography                                  |
| ROC               | Receiver Operating Characteristics Curve                |
| RT                | reaction time                                           |
| SCID              | sexual content induced delay                            |
| SSPI              | Screening Scale for Pedophilic Interests                |
| VPS               | Virtual People Set                                      |

---
